# Supplementary material for: Simple and sensitive determination of sulfites in Chinese herbal teas by ultrahigh-performance liquid chromatography tandem mass spectrometry
Source: Royal Society of Chemistry journal article supplement (doi:10.1039/d2ay00759b), 2022-01-01
Supplement: d2ay00759b1.pdf [file d2ay00759b1.pdf]

## Supporting Information

### Simple and sensitive determination of sulfite in Chinese herbal teas by ultrahigh-performance liquid chromatography tandem mass spectrometry

Leiwenxuan Yang<sup>a,c</sup>, Gaohua Hu<sup>a,c</sup>, Yali Huang<sup>a,c</sup>, Chen Wang<sup>a,c</sup>, Xin Liu<sup>a,b</sup>, Chengyin Lu<sup>a,b</sup>, Hongping Chen<sup>a,b</sup>, Jianyang Zhang<sup>a\*</sup> and Guicen Ma<sup>a,b\*</sup>

<sup>a</sup>*Tea Research Institute, Chinese Academy of Agricultural Sciences, Hangzhou, 310008, China*

<sup>b</sup>*Laboratory of Quality and Safety and Risk Assessment for Tea Products (Hangzhou), Ministry of Agriculture and Rural Affairs, Hangzhou, 310008, China*

<sup>c</sup>*Graduate School of Chinese Academy of Agricultural Sciences, Beijing, China*

*E-mail: mgc1314@tricaas.com; xianyu20082003@tricaas.com.*

Phone:+86-571-8665-1650, Fax:+86-571-8665-2004

Address: Tea Research Institute, Chinese Academy of Agricultural Sciences, 9 Meiling South Road, Hangzhou, Zhejiang Province, 310008, China.

### 1.1 Preparation of extraction solution

A 2% formaldehyde buffer solution was prepared by weighing 0.77 g ammonium acetate in ultrapure water, adding 10.8 mL of 37% formaldehyde solution in a 200 mL volumetric flask and diluting to 200 mL with water. The pH of the solution was adjusted at 4.5 by dropwise addition of acetic acid. The working 0.2% formaldehyde extraction solution was diluted the 2% formaldehyde solution with ultrapure water. The 0.2% and 2% formaldehyde solutions were stored at 4°C for at least one week and one month.

### 1.2 Standard Preparation

Stock standard solution of HMS was prepared at 1000 mg L<sup>-1</sup> by accurately weighing 10 mg of sodium sulfite (Na<sub>2</sub>SO<sub>3</sub>) and dissolving in 2% formaldehyde solution into 10 mL volumetric flask. On the day of analysis, further dilutions with 0.2% formaldehyde solutions were obtained different concentrations of 1, 5, 10 and 100 mg L<sup>-1</sup> of Na<sub>2</sub>SO<sub>3</sub> working standard solutions.

### 1.3 Statistical Analysis

Determination of sulfite concentration of herbal tea samples were compared between UPLC-MS/MS and IT method using a two-sample independent t-test ( $p < 0.05$ ). All the analysis were done employing SPSS version 26 (SPSS, Inc., Chicago, IL, USA)

**Table S1** The MS/MS parameters for the analysis of HMS

| Q1 Mass<br>(m/z) | Q2 Mass<br>(m/z) | dwel time (ms) | DP(V) | EP(V) | CE (V) |
|------------------|------------------|----------------|-------|-------|--------|
| 111.0            | 80.8             | 300            | -42.0 | -10.0 | -16.0  |
| 111.0            | 79.9             | 300            | -42.0 | -10.0 | -35.0  |

**Table S2** Matrix effects of different adsorbents

| Adsorbents | ME (%) |
|------------|--------|
| Crude      | -81.1  |
| CS/prGO/DM | -63.5  |
| GCB        | -67.6  |
| C18        | -70.9  |
| PVPP       | -79.1  |
| SAX        | -81.5  |
| PSA        | -80.1  |

**Table S3** The corrected calibration equation of sulfite in three types of herbal teas.

| Matrix        | Corrected calibration equation                |
|---------------|-----------------------------------------------|
| Chrysanthemum | $y = 6.727 \times 10^6 x + 7.211 \times 10^3$ |
| Rose          | $y = 1.467 \times 10^7 x + 1.075 \times 10^4$ |
| Wolfberry     | $y = 1.137 \times 10^7 x + 3.913 \times 10^4$ |

**Table S4** The proposed method was compared with other previous reported LC-MS/MS methods for determination of sulfites in food

| Method   | Matrix                                                                                                           | Extraction procedure | Clean-up procedure           | Organic solvent(mL) | Recovery (%) | Reference              |
|----------|------------------------------------------------------------------------------------------------------------------|----------------------|------------------------------|---------------------|--------------|------------------------|
| LC-MS/MS | Chrysanthemum<br>Rose<br>Wolfberry                                                                               | Once extraction      | dSPE(CS/pr GO/DM composites) | 0                   | 84-103       | This work              |
| LC-MS/MS | white grape juice<br>molasses<br>dried potatoes<br>crystallized<br>ginger<br>dried apricots<br>frozen raw shrimp | Multiple extraction  | SPE (C18 SPE cartridge)      | 6                   | 86-114       | US FDA Method C-004.03 |

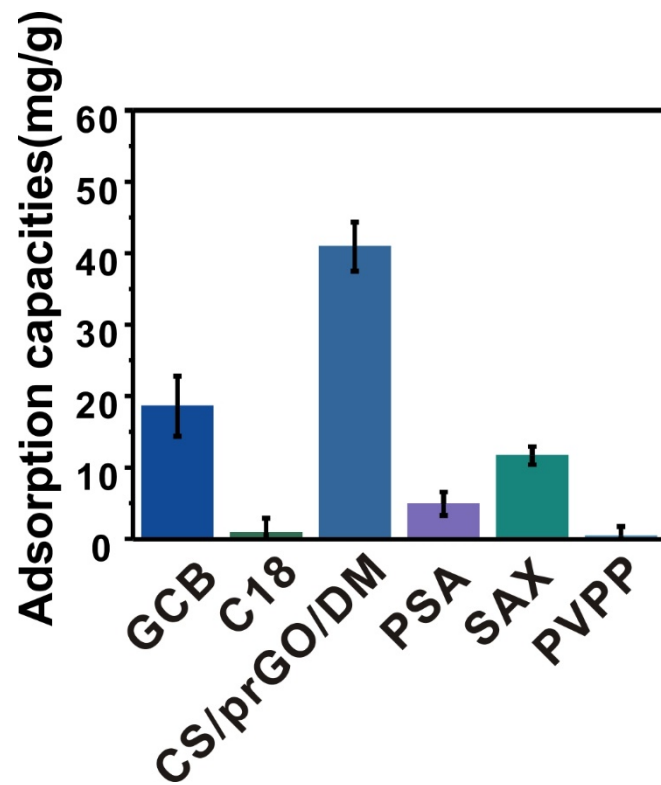

**Fig. S1** Adsorption capacities of different adsorbents from chrysanthemum extracts.

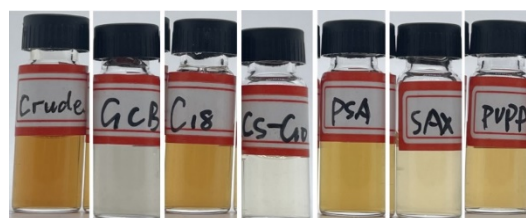

**Fig. S2** The photographs of chrysanthemum sample extract after purification by different dSPE adsorbents.

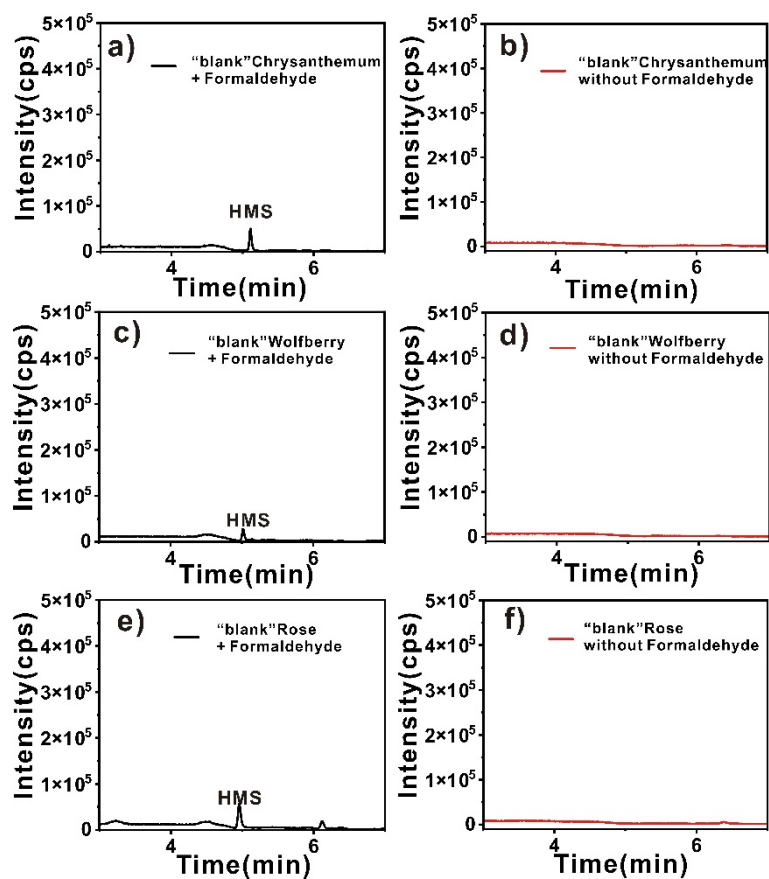

**Fig. S3** UPLC-MS/MS chromatograms of sulfites from “blank” Chinese herbal tea samples with and without formaldehyde. a) and b) “blank” chrysanthemum sample with and without formaldehyde; c) and d) “blank” wolfberry sample with and without formaldehyde; e) and f) “blank” rose sample with and without formaldehyde.

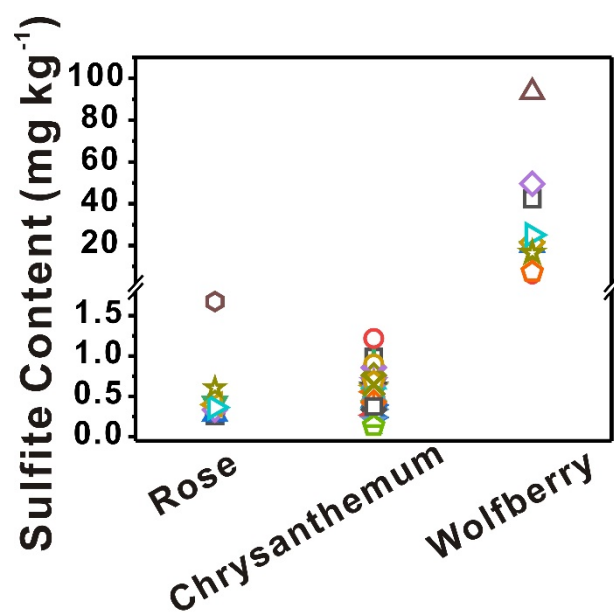

**Fig. S4** The distribution of sulfite concentration in real Chinese herbal tea samples.
